# Supplementary material for: Structural mechanism of DNA-mediated Nanog–Sox2 cooperative interaction
Source: Royal Society of Chemistry journal article supplement (doi:10.1039/c8ra10085c), 2019-01-01
Supplement: c8ra10085c1.pdf [file c8ra10085c1.pdf]

<Supplementary Information>

**Structural mechanism of DNA-mediated Nanog-Sox2 cooperative interaction**

Dhanusha Yesudhas, Muhammad Ayaz Anwar and Sangdun Choi\*

Department of Molecular Science and Technology, Ajou University, Suwon, 16499, Korea

**\*Correspondence**

Sangdun Choi

Department of Molecular Science and Technology, Ajou University, Suwon, 443-749, Korea

Fax: +82 31-219-1615

Tel: +82 31-219-2600

E-mail: [sangdunchoi@ajou.ac.kr](mailto:sangdunchoi@ajou.ac.kr)

**Running Title:** *In silico* analysis of Nanog-Sox2 mediated cooperativity in transcription

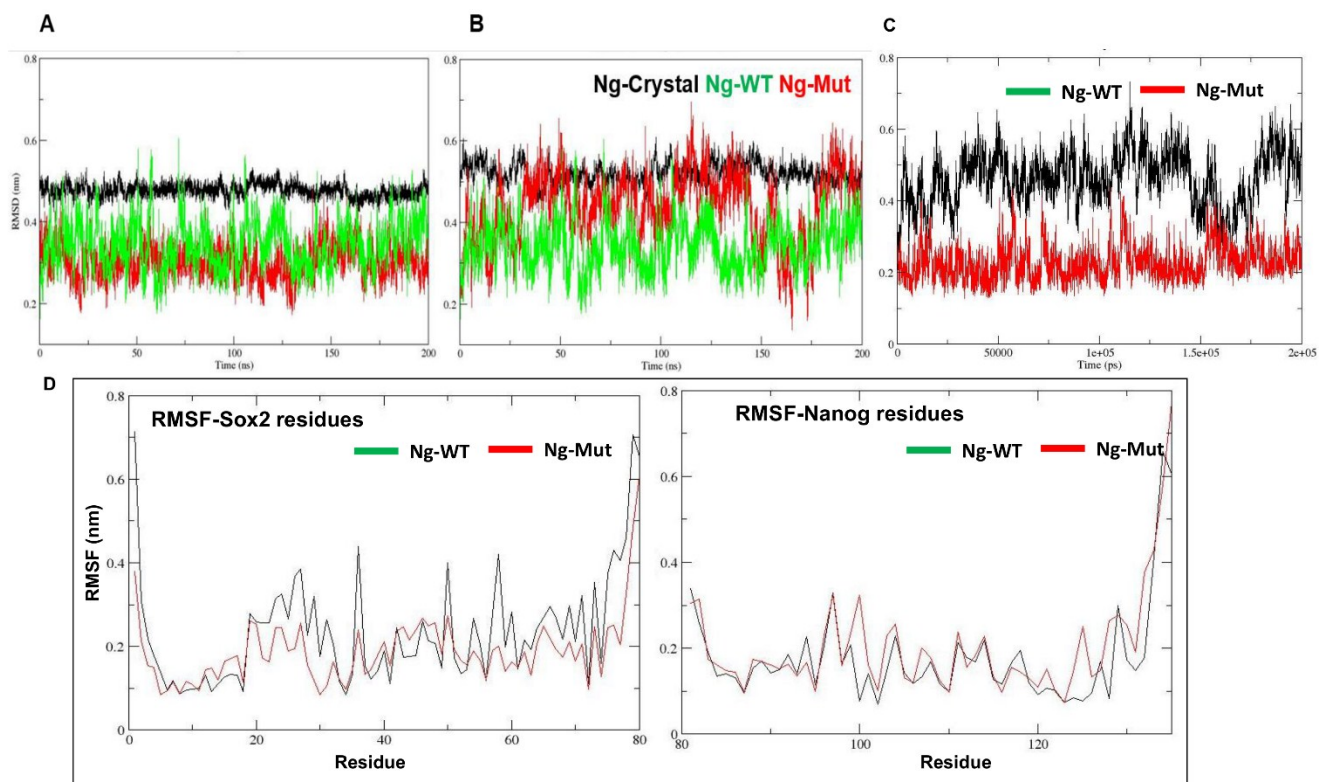

**Fig. S1 | Root mean square deviation (RMSD) and Root mean square fluctuation (RMSF) for Ng-WT, Ng-Mut, and Ng-Crystal.** RMSD of the backbone carbon atoms for Ng-WT, Ng-Mut, and Ng-Crystal are showing the overall fluctuations throughout the simulation. A, B and C refers to three different independent simulations for these systems. (D) The representation of RMSF fluctuations of Nanog and Sox2 residues in Ng-WT and Ng-Mut complexes.

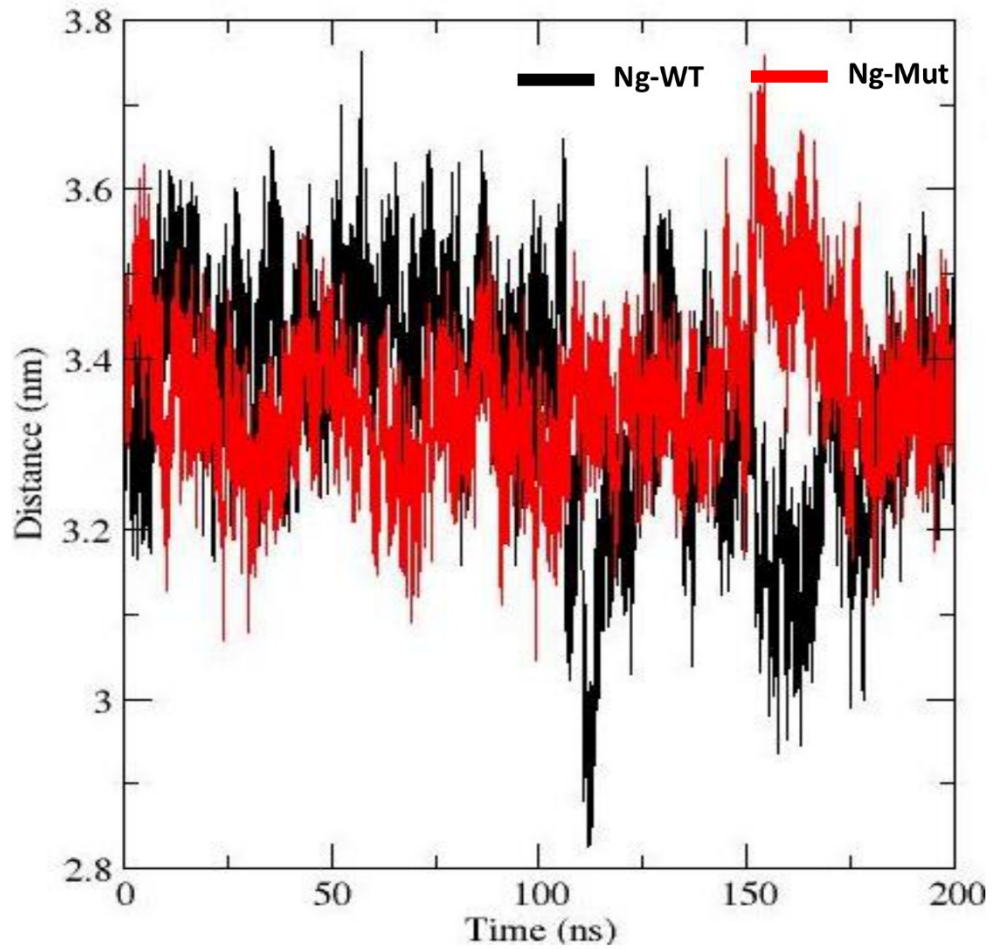

**Fig. S2 | Minimum distance between Nanog and Sox2 in Ng-WT and Ng-Mut. (A)** Representation of minimum distance between Nanog and Sox2 in Ng-WT and Ng-Mut with simulation time along the X-axis and distance along the Y-axis.

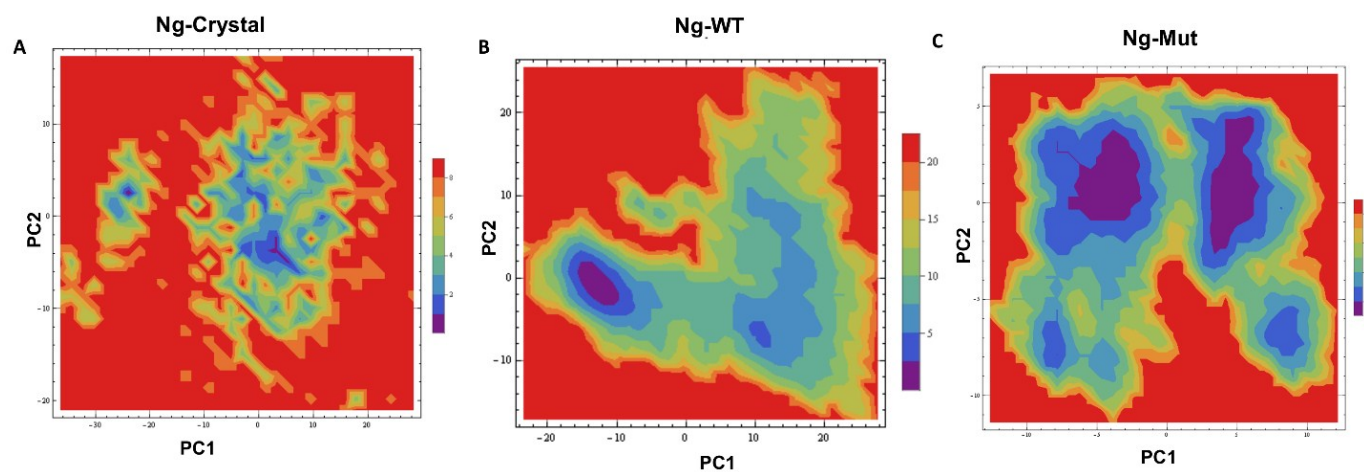

**Fig. S3 | Free energy landscape (FEL).** FEL representation along with the energy values are displayed for Ng-crystal (A), Ng-WT (B) and Ng-Mut (C) complexes.

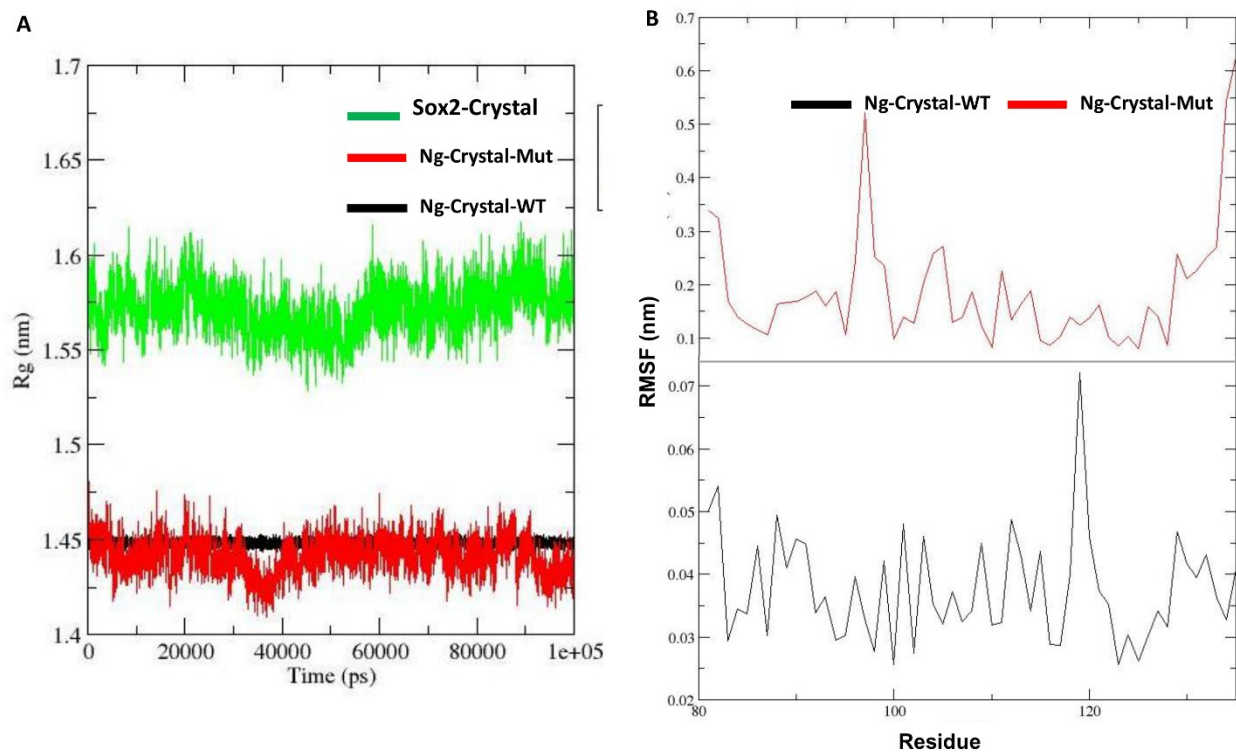

**Fig. S4 | Radius of gyration and RMSF of Ng-Crystal-WT/Mut** (A) Representation of radius of gyration in all three crystal structure, displays the Ng-Crystal-WT has better and compact conformation. (B) Representation of Nanog residues fluctuations in Ng-Crystal complexes.

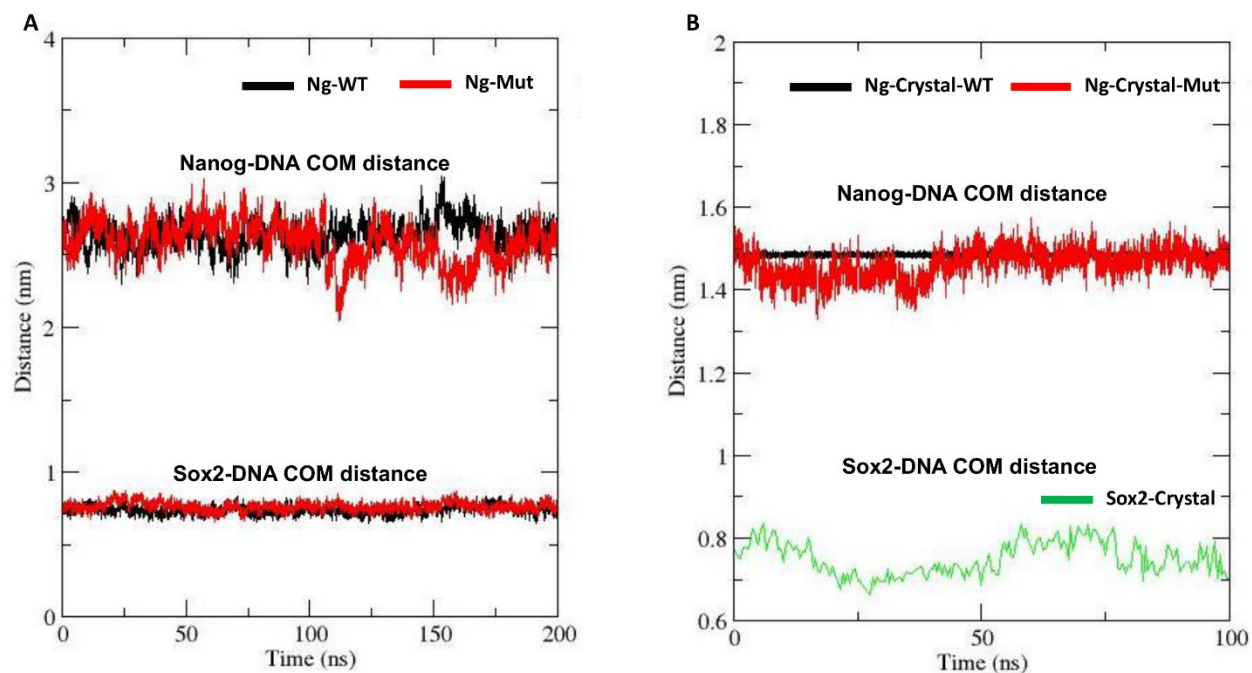

**Fig. S5 | Distance between the proteins and DNA** (A) Representation of distance between Nanog and DNA as well as Sox2 and DNA in Ng-WT and Ng-Mut with simulation time along the X-axis and distance along the Y-axis. (B) Representation of distance between Nanog and DNA in Ng-Crystal-WT and Ng-Crystal-Mut complexes, along with the Sox2-DNA distance in the Sox2-crystal complex.

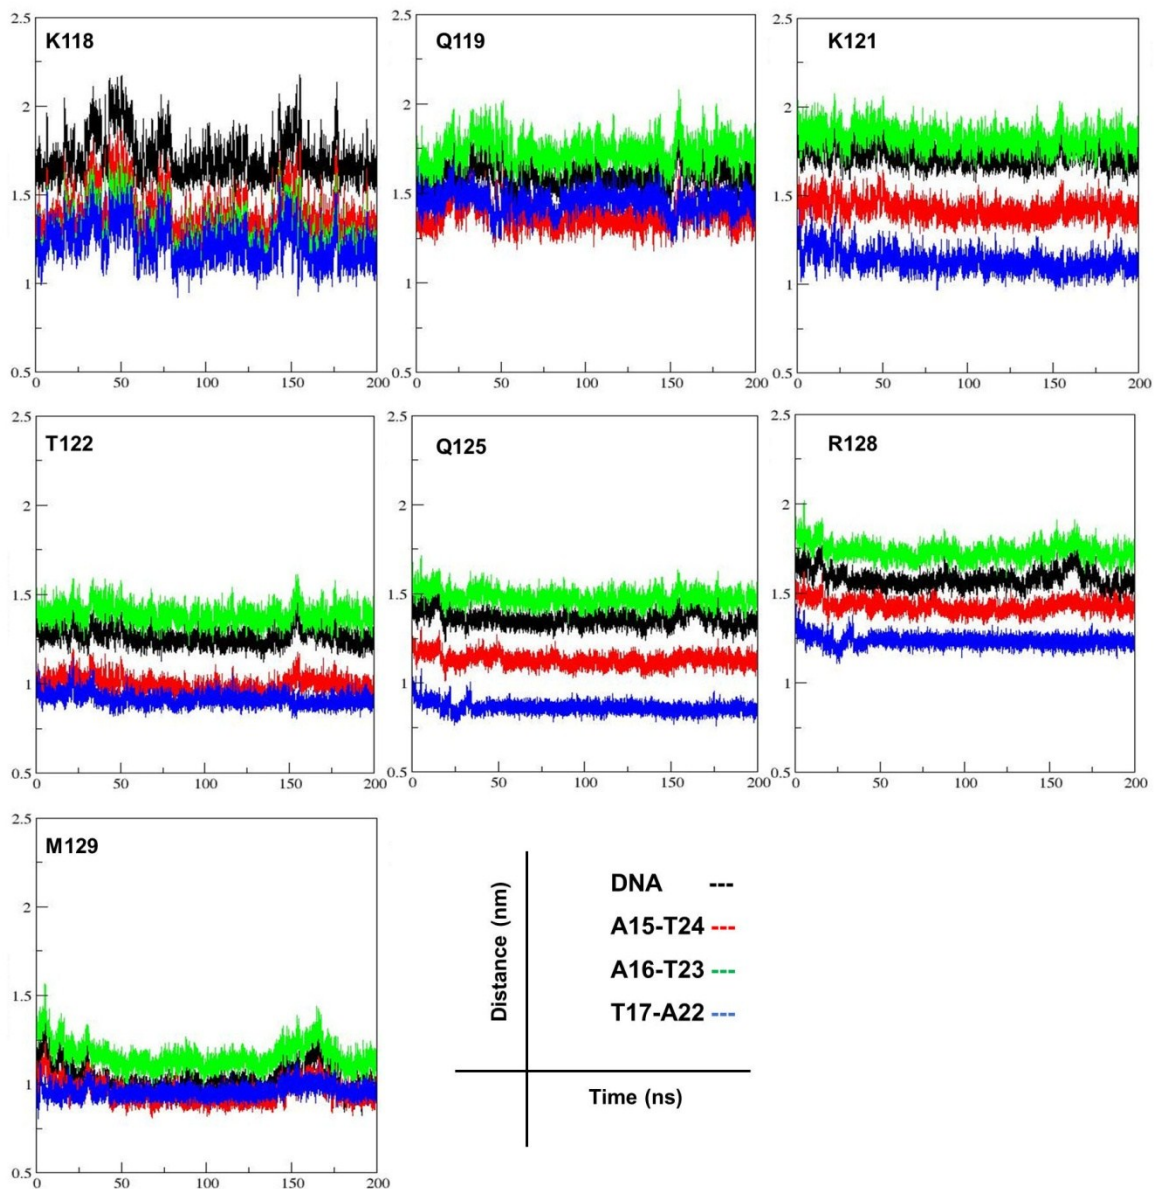

**Fig. S6 | Residual movement of Ng-WT with respect to DNA sequence.** Representation of the position of helix 3 residues K118, Q119, K121, T122, Q125, R128 and M129 with respect to the plane of DNA bases with simulation time along the X-axis and distance along the Y-axis.

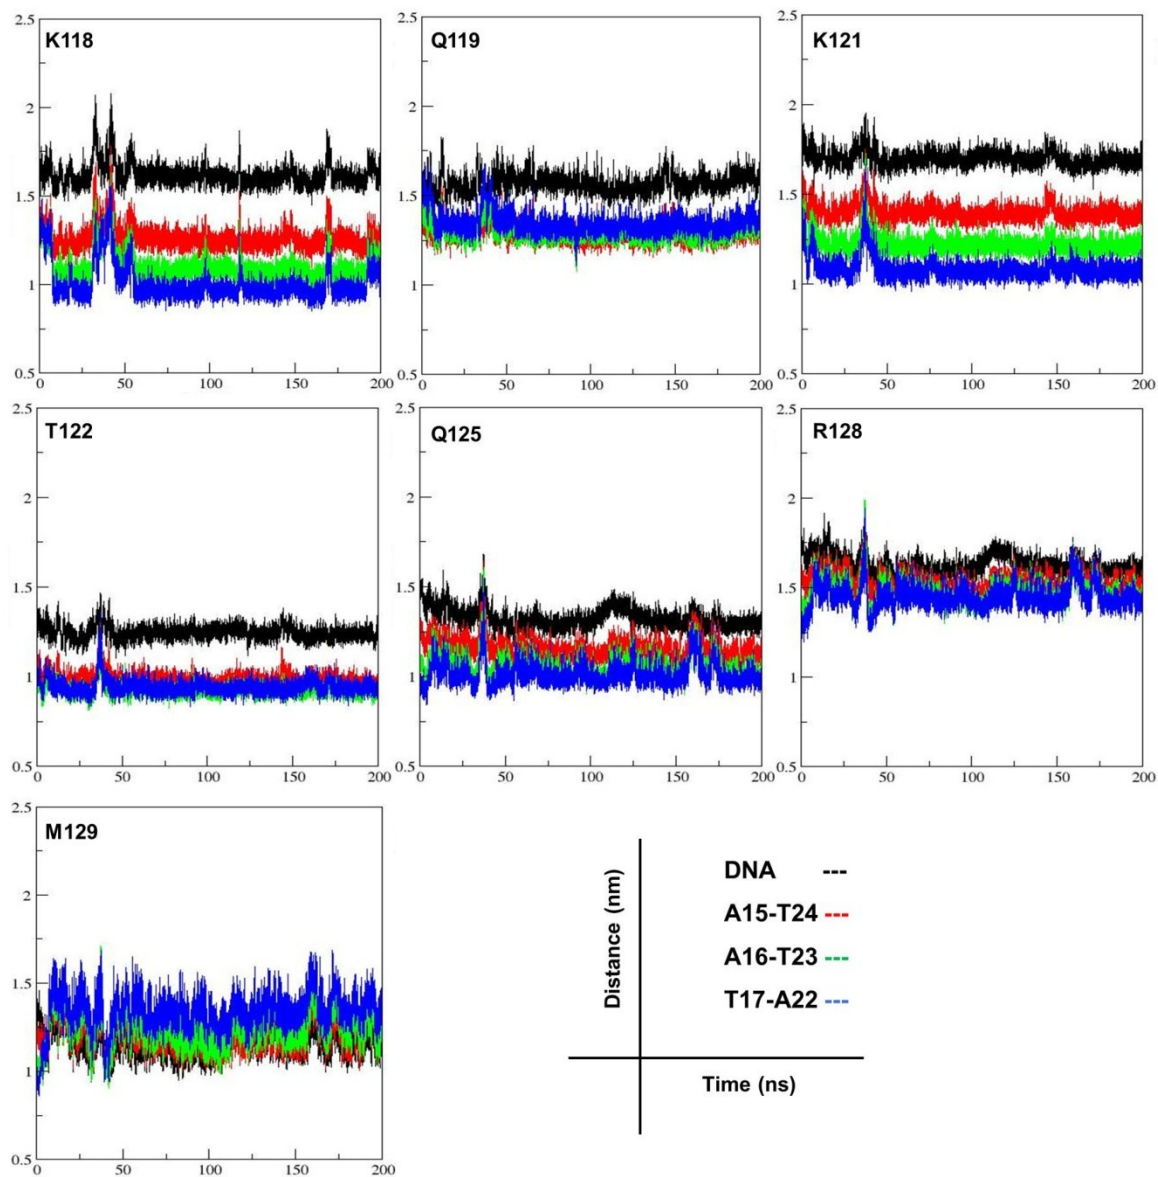

**Fig. S7 | Residual movement of Ng-Mut with respect to DNA sequence.** Representation of the position of helix 3 residues K118, Q119, K121, T122, Q125, R128, and M129 with respect to the plane of DNA bases with simulation time along the X-axis and distance along the Y-axis.

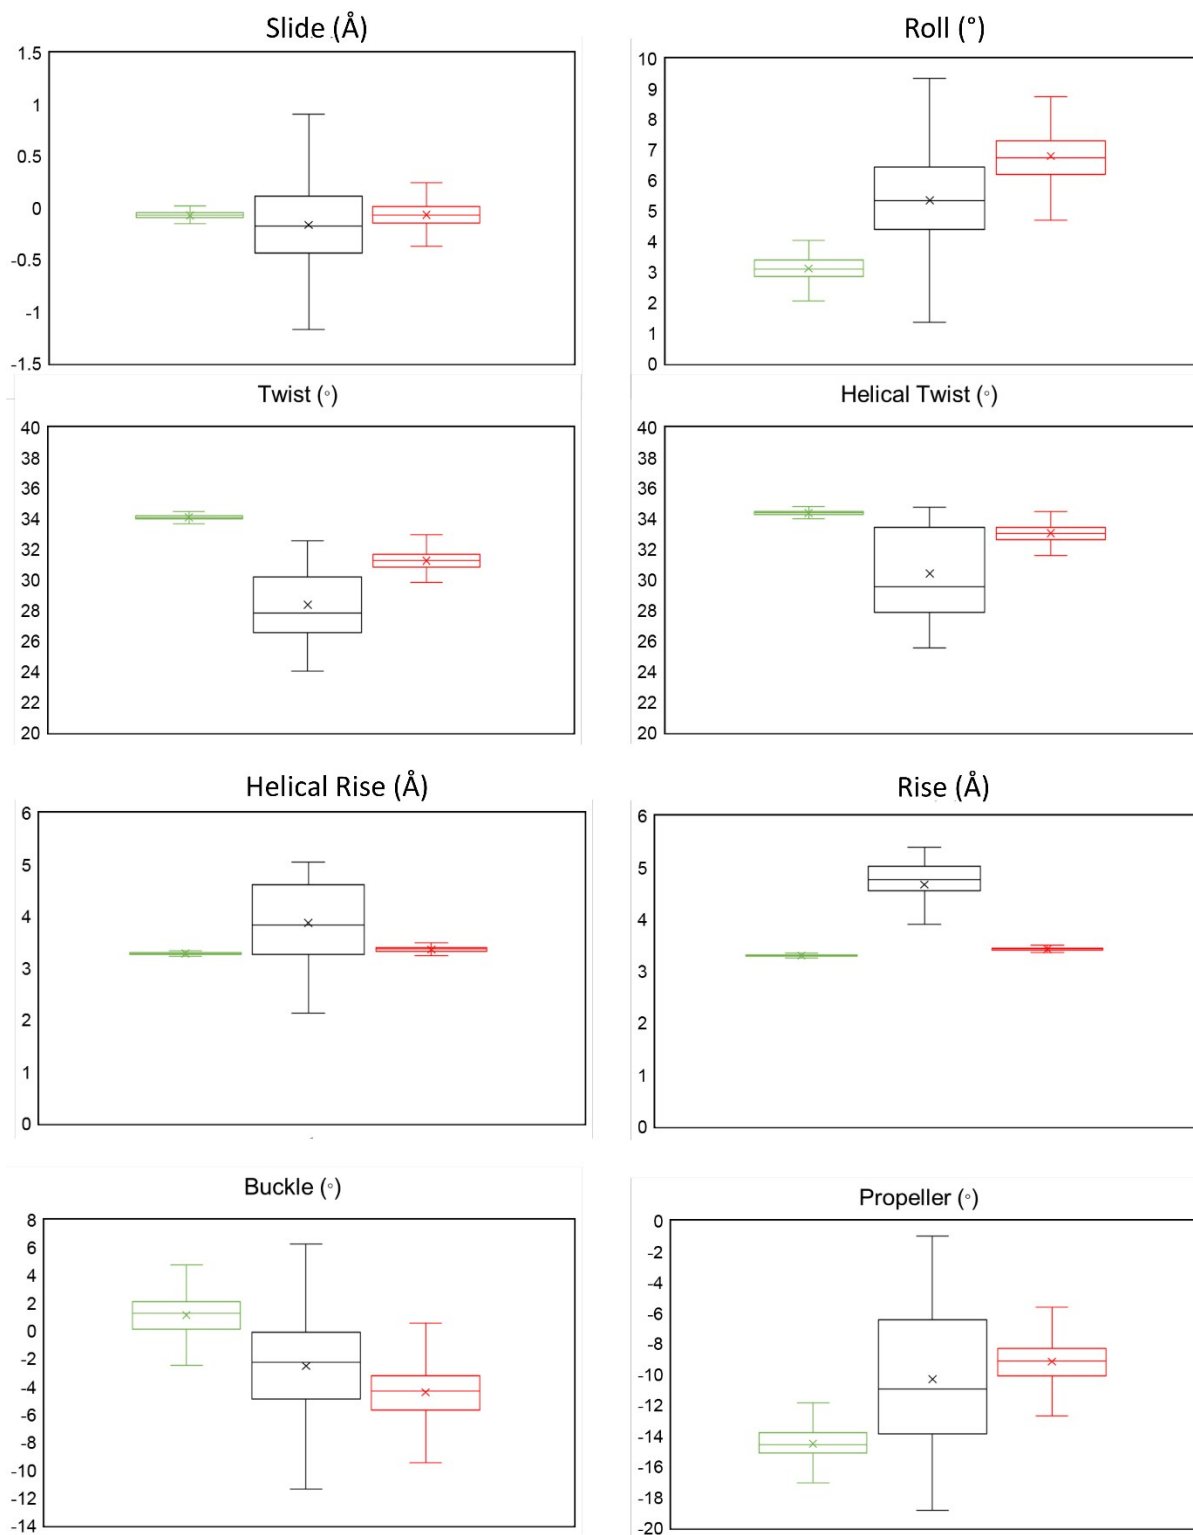

**Fig. S8 | Comparison of DNA parameters.** Various DNA parameters describing the A-DNA or



B-DNA have been presented. The data of DNA parameters from Ng-Crystal, Ng-WT and Ng-Mut are given in green, black and red respectively.

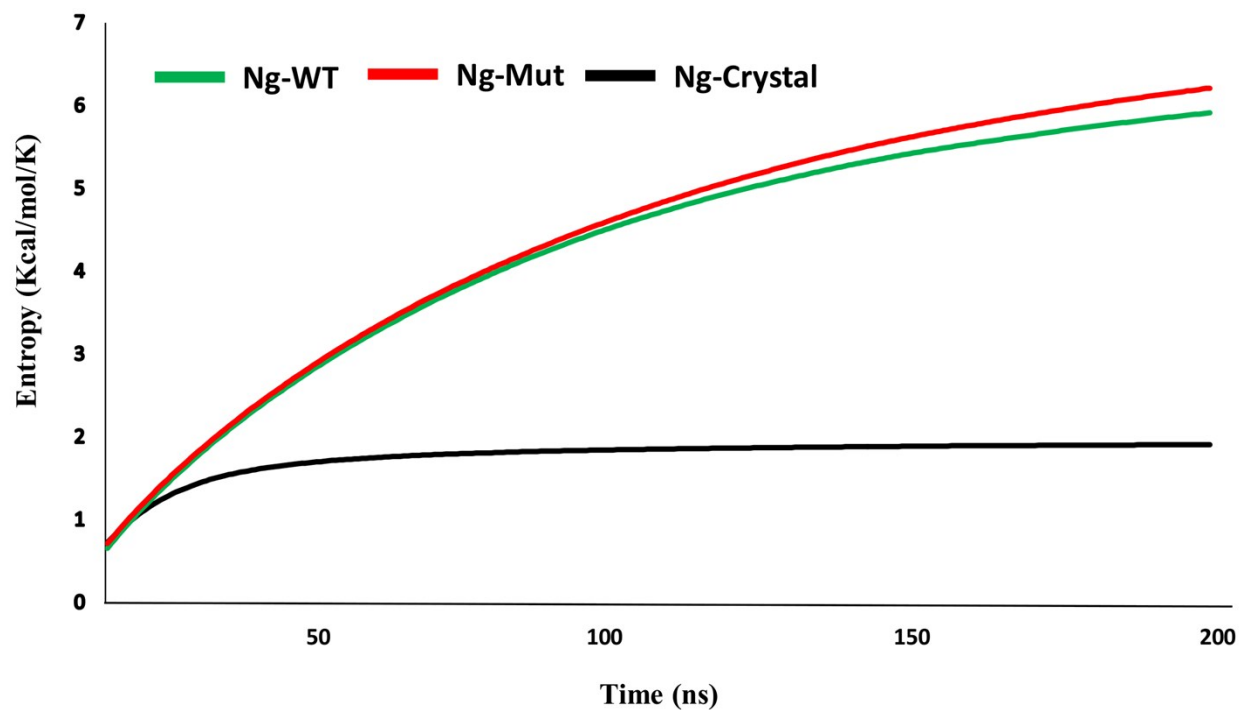

**Fig. S9 | Quasi entropy values.** The entropy energy values for Ng-WT, Ng-Mut, and Ng-Crystal calculated using quasi harmonic approximation method are plotted as a graph with the simulation time along the X-axis and entropy energy values along the Y-axis. The graph is plotted based on the average values from three independent simulations.

| Ng-crystal-WT |            |           |            |              | Ng-Crystal-Mut |            |            |            |              |
|---------------|------------|-----------|------------|--------------|----------------|------------|------------|------------|--------------|
| TYR37         | HE2        | DG2       | O1P        | 3.273        | TYR117         | OH         | DG2        | O1P        | 2.626        |
| LYS41         | HD2        | DG2       | H2'        | 2.989        | LYS121         | HE1        | DG2        | O5'        | 3.147        |
| ARG48         | HH2        | DC3       | P          | 3.422        | ARG128         | HH2        | DC3        | O2P        | 2.982        |
| TYR20         | HE2        | DC3       | H3'        | 3.194        | GLN125         | CD         | DC3        | H3'        | 3.481        |
| GLN45         | OE1        | DC3       | H3'        | 2.809        | TYR100         | HE2        | DC3        | O3'        | 2.939        |
| GLN45         | HE2        | DC4       | H2'        | 3.363        | MET129         | HE3        | DC4        | H3'        | 3.392        |
| LYS52         | NZ         | DC5       | P          | 3.121        | LYS132         | NZ         | DC4        | H3'        | 3.392        |
| THR1          | O          | DA17      | H4'        | 2.214        | TRP123         | HE1        | DA17       | O2P        | 3.112        |
| ASN46         | HD2        | DA17      | C8         | 3.105        | PHE83          | CE2        | DA17       | O5'        | 3.373        |
| GLN39         | HE2        | DA18      | O2P        | 3.454        | THR81          | O          | DA17       | H4'        | 2.813        |
| THR42         | CG2        | DA18      | H8         | 3.487        | ASN126         | HD2        | DA17       | C8         | 3.281        |
| LYS38         | HZ2        | DT19      | O2P        | 3.397        | GLN119         | HE2        | DA18       | P          | 3.308        |
| <b>LYS21</b>  | <b>OE1</b> | <b>DC</b> | <b>H3'</b> | <b>3.212</b> | THR122         | HG2        | DA18       | H8         | 2.901        |
|               |            |           |            |              | ASN126         | HD2        | DA18       | H8         | 3.163        |
|               |            |           |            |              | <b>GLU103</b>  | <b>OE1</b> | <b>DC3</b> | <b>H3'</b> | <b>3.112</b> |
|               |            |           |            |              | THR122         | HG2        | DT19       | H71        | 3.301        |
|               |            |           |            |              |                |            |            |            |              |

**Table S1 | Protein-Protein interacting residues in Ng-Crystal complexes.** The interacting residues of Nanog with the base pairs interactions have been tabulated, and the interacting distance is in Å. The mutant residue interaction has been marked in bold.
